# Supplementary material for: Evaluation of ERBB2 mRNA Expression in HER2-Equivocal (2+) Immunohistochemistry Cases
Source: MDPI journal article supplement (doi:10.3390/cancers15061688), 2023-03-09
Supplement: s1 [file s1]

Supplemental Figures

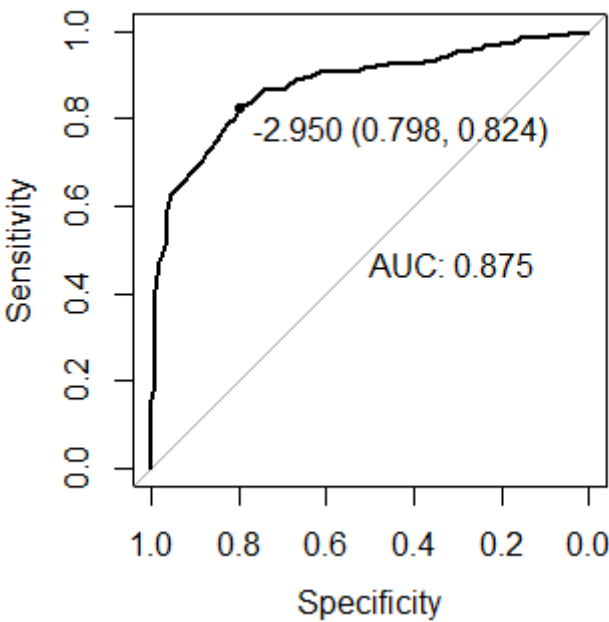

Supplemental Figure S1: ROC curve for the best MKi67 dCt threshold in our series.

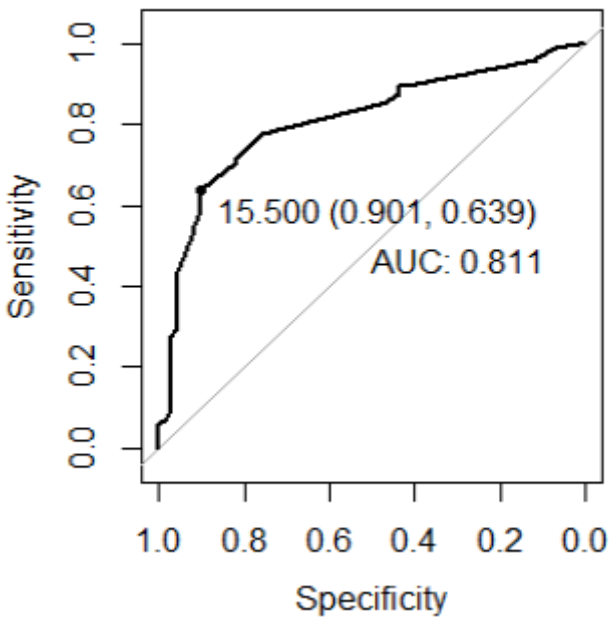

Supplemental Figure S2: ROC curve for the best Ki67 IHQ threshold in our series.

Supplemental Table S1. Histopathological features of the cases with a failed STRAT4 determination.

|                    |                             | Total | Percentage |
|--------------------|-----------------------------|-------|------------|
|                    |                             | 8     | 100        |
| Histological grade | 1                           | 1     | 12.5       |
|                    | 2                           | 3     | 37.5       |
|                    | 3                           | 4     | 50         |
| Histological type  | IBC, no special type        | 8     | 100        |
| ER                 | Positive                    | 1     | 12.5       |
|                    | Negative                    | 7     | 87.5       |
| PR                 | Positive                    | 5     | 62.5       |
|                    | Negative                    | 3     | 37.5       |
| HER2               | Equivocal 2+ (no amplified) | 3     | 37.5       |
|                    | Negative (1+)               | 4     | 50         |
|                    | Negative (0+)               | 1     | 12.5       |
| Ki67               | Positive                    | 2     | 33.1       |
|                    | Negative                    | 6     | 75         |

Supplemental Table S2. Biomarkers results of both techniques for the discordant cases.

| ID | HER2<br>IHQ | HER2<br>FISH | ERBB<br>2 dCt | HER2<br>concordance | ER % | ESR1<br>dCt | ER<br>concordance | PR % | PGR<br>dCt | PR<br>concordance | Ki67<br>% | MKi6<br>7 dCt | Ki67<br>concordance | Sample<br>type |
|----|-------------|--------------|---------------|---------------------|------|-------------|-------------------|------|------------|-------------------|-----------|---------------|---------------------|----------------|
| 2  | 2           | Negative     | -1.3          | Concordant          | 70   | 2.2         | Concordant        | 0    | -3.5       | Discordant        | 8         | -2.3          | Discordant          | Core biopsy    |
| 4  | 2           | Positive     | 0             | Concordant          | 90   | 3.1         | Concordant        | 0    | -3         | Discordant        | 14        | -3.1          | Discordant          | Core biopsy    |
| 5  | 2           | Positive     | -2            | Discordant          | 80   | 2.1         | Concordant        | 18   | -1.1       | Concordant        | 45        | -1.4          | Concordant          | Core biopsy    |
| 7  | 2           | Positive     | 1             | Concordant          | 0    | 0.1         | Discordant        | 0    | -4.5       | Concordant        | 5         | -2.1          | Discordant          | Core biopsy    |
| 8  | 2           | Positive     | -2.1          | Discordant          | 0    | -5.1        | Concordant        | 0    | -5.5       | Concordant        | 40        | -1.1          | Concordant          | Core biopsy    |
| 11 | 2           | Positive     | -3.1          | Discordant          | 0    | -0.6        | Discordant        | 0    | -2.5       | Discordant        | 18        | -4.2          | Concordant          | Core biopsy    |
| 13 | 2           | Positive     | 0.2           | Concordant          | 80   | 0.4         | Concordant        | 0    | -3.1       | Discordant        | 20        | -2.1          | Discordant          | Core biopsy    |
| 16 | 2           | Positive     | -1.5          | Discordant          | 100  | 3           | Concordant        | 0    | -2.4       | Discordant        | 16        | -2.4          | Discordant          | Core biopsy    |
| 18 | 2           | Positive     | -1            | Concordant          | 100  | 4           | Concordant        | 90   | 2.1        | Concordant        | 17        | -2.9          | Discordant          | Core biopsy    |
| 20 | 2           | Positive     | 0             | Concordant          | 60   | 0.7         | Concordant        | 0    | -2.3       | Discordant        | 38        | -0.9          | Concordant          | Core biopsy    |
| 23 | 2           | Positive     | 0.1           | Concordant          | 90   | 3.1         | Concordant        | 15   | -1         | Concordant        | 8         | -2.8          | Discordant          | Core biopsy    |
| 24 | 2           | Positive     | -1.2          | Discordant          | 100  | 3.3         | Concordant        | 100  | 2.4        | Concordant        | 25        | -1.8          | Concordant          | Core biopsy    |
| 25 | 2           | Positive     | -2.1          | Discordant          | 10   | -1.6        | Discordant        | 0    | -7         | Concordant        | 80        | -0.9          | Concordant          | Core biopsy    |
| 28 | 2           | Negative     | -0.9          | Discordant          | 100  | 2.3         | Concordant        | 70   | 0.8        | Concordant        | 20        | -3.1          | Discordant          | Core biopsy    |

|    |   |          |      |            |     |      |            |     |      |            |    |      |            |             |
|----|---|----------|------|------------|-----|------|------------|-----|------|------------|----|------|------------|-------------|
| 29 | 2 | Negative | -1.8 | Concordant | 60  | 2.9  | Concordant | 50  | 2.2  | Concordant | 18 | -1.6 | Discordant | Core biopsy |
| 30 | 2 | Negative | -1.2 | Concordant | 75  | 0.9  | Concordant | 90  | 1    | Concordant | 10 | -2.2 | Discordant | Core biopsy |
| 31 | 2 | Negative | -1.1 | Concordant | 100 | 1.9  | Concordant | 100 | 1.6  | Concordant | 15 | -2.8 | Discordant | Core biopsy |
| 32 | 2 | Negative | -3.6 | Concordant | 0   | -0.8 | Discordant | 0   | -2.5 | Discordant | 80 | -0.9 | Concordant | Core biopsy |
| 33 | 2 | Negative | -0.8 | Discordant | 90  | 2.3  | Concordant | 5   | -3.3 | Concordant | 10 | -2.3 | Discordant | Core biopsy |
| 34 | 2 | Negative | -1.2 | Concordant | 90  | 3.9  | Concordant | 60  | 1.8  | Concordant | 14 | -3.7 | Discordant | Core biopsy |
| 35 | 2 | Negative | -0.7 | Discordant | 95  | 4.4  | Concordant | 80  | 1.3  | Concordant | 12 | -4.4 | Concordant | Core biopsy |
| 36 | 2 | Negative | -1.1 | Concordant | 95  | 3.4  | Concordant | 0   | -1.4 | Discordant | 5  | -3.7 | Discordant | Core biopsy |
| 37 | 2 | Negative | -1.2 | Concordant | 90  | 4    | Concordant | 0   | -6.2 | Concordant | 13 | -3.3 | Discordant | Core biopsy |
| 39 | 2 | Negative | -1.9 | Concordant | 0   | -1.7 | Concordant | 0   | -1.9 | Discordant | 12 | -3.2 | Discordant | Core biopsy |
| 40 | 2 | Negative | -3.3 | Concordant | 90  | 0.9  | Concordant | 0   | -2.8 | Discordant | 12 | -4.6 | Concordant | Core biopsy |
| 43 | 2 | Negative | -1.9 | Concordant | 100 | 4.1  | Concordant | 70  | 0.9  | Concordant | 15 | -1.1 | Discordant | Core biopsy |
| 44 | 2 | Negative | -3.1 | Concordant | 90  | 1.7  | Concordant | 70  | 1.1  | Concordant | 5  | -2.5 | Discordant | Core biopsy |
| 45 | 2 | Negative | -0.7 | Discordant | 80  | 1.8  | Concordant | 80  | 0.6  | Concordant | 50 | -1.9 | Concordant | Core biopsy |
| 46 | 2 | Negative | -1.5 | Concordant | 100 | 3.1  | Concordant | 15  | -1.8 | Concordant | 8  | -3.4 | Discordant | Core biopsy |
| 48 | 2 | Negative | 0.1  | Discordant | 100 | 4.4  | Concordant | 60  | -8.8 | Discordant | 12 | -3.4 | Discordant | Core biopsy |
| 49 | 2 | Negative | -1.1 | Concordant | 90  | 3.8  | Concordant | 80  | 1.1  | Concordant | 17 | -2.3 | Discordant | Core biopsy |
| 50 | 2 | Negative | -2.4 | Concordant | 100 | 3.4  | Concordant | 15  | -0.5 | Concordant | 18 | -1.4 | Discordant | Core biopsy |
| 52 | 2 | Negative | -4.6 | Concordant | 0   | 0.7  | Discordant | 0   | -1.2 | Discordant | 28 | -6.6 | Discordant | Core biopsy |
| 54 | 2 | Positive | -2   | Discordant | 0   | -2.4 | Concordant | 0   | -3.9 | Concordant | 25 | -1   | Concordant | Core biopsy |
| 55 | 2 | Positive | 0.7  | Concordant | 0   | -10  | Concordant | 0   | -8.8 | Concordant | 17 | -1.1 | Discordant | Core biopsy |
| 56 | 2 | Positive | 2.3  | Concordant | 70  | 0.2  | Concordant | 0   | -1.7 | Discordant | 30 | -1.9 | Concordant | Core biopsy |
| 57 | 2 | Positive | 1.9  | Concordant | 90  | 2.2  | Concordant | 90  | 1.5  | Concordant | 20 | -2.1 | Discordant | Core biopsy |
| 59 | 2 | Positive | -3.7 | Discordant | 75  | 2.5  | Concordant | 90  | 2.2  | Concordant | 20 | -1   | Discordant | Core biopsy |
| 60 | 2 | Positive | 0    | Concordant | 70  | 1    | Concordant | 50  | -0.4 | Concordant | 12 | -2.9 | Discordant | Core biopsy |
| 61 | 2 | Positive | -1.4 | Discordant | 90  | 2    | Concordant | 5   | -3   | Concordant | 13 | -1.7 | Discordant | Core biopsy |
| 62 | 2 | Positive | -2   | Discordant | 90  | 2.3  | Concordant | 15  | -2.7 | Concordant | 25 | -1.9 | Concordant | Core biopsy |
| 63 | 2 | Positive | -0.1 | Concordant | 40  | 3    | Concordant | 30  | -1.1 | Concordant | 60 | -10  | Discordant | Core biopsy |

|     |   |          |      |            |     |      |            |     |      |            |    |      |            |                   |
|-----|---|----------|------|------------|-----|------|------------|-----|------|------------|----|------|------------|-------------------|
| 64  | 2 | Negative | -1.3 | Concordant | 70  | 1    | Concordant | 70  | 0.9  | Concordant | 20 | -1.4 | Discordant | Core biopsy       |
| 65  | 2 | Negative | -0.9 | Discordant | 100 | 4    | Concordant | 35  | 0.5  | Concordant | 12 | -3.9 | Discordant | Core biopsy       |
| 66  | 2 | Negative | -1.3 | Concordant | 70  | 3.1  | Concordant | 0   | -2.4 | Discordant | 15 | -1.9 | Discordant | Core biopsy       |
| 71  | 2 | Negative | -3   | Concordant | 80  | 2    | Concordant | 15  | -1.8 | Concordant | 10 | -2.7 | Discordant | Core biopsy       |
| 72  | 2 | Negative | -1   | Discordant | 100 | 4.7  | Concordant | 80  | -0.7 | Concordant | 10 | -4.2 | Concordant | Core biopsy       |
| 74  | 2 | Negative | -4   | Concordant | 0   | -0.9 | Discordant | 0   | -5.6 | Concordant | 45 | 0.7  | Concordant | Core biopsy       |
| 83  | 2 | Negative | -1.5 | Concordant | 0   | -4.5 | Concordant | 0   | -3.4 | Discordant | 22 | -1.8 | Concordant | Core biopsy       |
| 87  | 2 | Negative | -1   | Discordant | 0   | -3.4 | Concordant | 0   | -5.1 | Concordant | 15 | -2.5 | Discordant | Core biopsy       |
| 109 | 2 | Negative | -2.3 | Concordant | 80  | 3.8  | Concordant | 70  | 1.9  | Concordant | 20 | -2.5 | Discordant | Surgical specimen |
| 135 | 2 | Negative | -3.6 | Concordant | 80  | 4.8  | Concordant | 30  | 1.8  | Concordant | 10 | -2.1 | Discordant | Surgical specimen |
| 143 | 2 | Negative | -1.7 | Concordant | 100 | 3.5  | Concordant | 0.5 | -3.6 | Concordant | 15 | -2   | Discordant | Core biopsy       |
| 145 | 2 | Negative | -1   | Discordant | 100 | 3.5  | Concordant | 60  | -0.5 | Concordant | 2  | -10  | Concordant | Core biopsy       |
| 147 | 2 | Negative | 0.4  | Discordant | 100 | 3.6  | Concordant | 60  | 1.8  | Concordant | 5  | -0.9 | Discordant | Core biopsy       |
| 149 | 2 | Negative | -2.9 | Concordant | 20  | 1.1  | Concordant | 2   | 0.3  | Concordant | 3  | -3.7 | Discordant | Core biopsy       |
| 170 | 2 | Negative | -2.9 | Concordant | 95  | 2.9  | Concordant | 25  | 0    | Concordant | 7  | -3.1 | Discordant | Core biopsy       |
| 174 | 2 | Negative | -1.1 | Concordant | 0   | -3   | Concordant | 0   | -4.1 | Concordant | 4  | -4   | Discordant | Core biopsy       |
| 190 | 2 | Negative | -2.9 | Concordant | 80  | 2.2  | Concordant | 70  | 2.3  | Concordant | 10 | -3.1 | Discordant | Core biopsy       |
| 196 | 2 | Negative | -2.2 | Concordant | 60  | 0.2  | Concordant | 0   | -4.8 | Concordant | 20 | -2.4 | Discordant | Core biopsy       |
| 211 | 2 | Negative | -2.9 | Concordant | 80  | 2.6  | Concordant | 80  | 2.7  | Concordant | 20 | -3.3 | Discordant | Core biopsy       |
| 226 | 2 | Negative | -4.3 | Concordant | 80  | 1.6  | Concordant | 80  | -1.4 | Concordant | 3  | -3.9 | Discordant | Core biopsy       |
| 228 | 2 | Negative | -3.3 | Concordant | 100 | 4    | Concordant | 35  | 1.2  | Concordant | 17 | -1.4 | Discordant | Core biopsy       |
| 239 | 2 | Negative | -2.8 | Concordant | 80  | 2.3  | Concordant | 20  | 0.9  | Concordant | 19 | -2.1 | Discordant | Core biopsy       |
| 243 | 2 | Negative | -2.3 | Concordant | 70  | 0.8  | Concordant | 60  | 0.6  | Concordant | 10 | -3.5 | Discordant | Core biopsy       |
| 246 | 2 | Negative | 1.3  | Discordant | 80  | 2.1  | Concordant | 30  | 0    | Concordant | 20 | -1.4 | Discordant | Core biopsy       |
| 249 | 2 | Negative | -3.1 | Concordant | 80  | 2.1  | Concordant | 60  | 1.3  | Concordant | 5  | -3.5 | Discordant | Core biopsy       |
| 252 | 2 | Negative | -2.7 | Concordant | 95  | 3.5  | Concordant | 0   | -7.3 | Concordant | 13 | -3.9 | Discordant | Core biopsy       |
| 77  | 0 | Negative | -4.3 | Concordant | 0   | -1.1 | Concordant | 0   | -2.2 | Discordant | 3  | -6.3 | Concordant | Core biopsy       |

|     |   |          |      |            |    |      |            |    |      |            |    |      |            |                   |
|-----|---|----------|------|------------|----|------|------------|----|------|------------|----|------|------------|-------------------|
| 78  | 0 | Negative | -2.3 | Concordant | 0  | -4.9 | Concordant | 0  | -1.8 | Discordant | 38 | -0.3 | Concordant | Core biopsy       |
| 81  | 0 | Negative | -4.9 | Concordant | 0  | -1.3 | Concordant | 0  | -1.4 | Discordant | 5  | -2.7 | Discordant | Core biopsy       |
| 82  | 0 | Negative | -3.1 | Concordant | 0  | -2.3 | Concordant | 0  | -1.1 | Discordant | 32 | -0.7 | Concordant | Core biopsy       |
| 85  | 0 | Negative | -3.9 | Concordant | 0  | -3.2 | Concordant | 0  | -4.5 | Concordant | 10 | -2   | Discordant | Core biopsy       |
| 90  | 0 | Negative | -2.7 | Concordant | 0  | -2.2 | Concordant | 0  | -2.7 | Discordant | 28 | -1.9 | Concordant | Core biopsy       |
| 92  | 0 | Negative | -4   | Concordant | 80 | 1.2  | Concordant | 80 | -1.6 | Concordant | 7  | -2.2 | Discordant | Surgical specimen |
| 94  | 0 | Negative | -2.2 | Concordant | 90 | 2.8  | Concordant | 40 | -0.3 | Concordant | 20 | -2.7 | Discordant | Surgical specimen |
| 96  | 0 | Negative | -2.8 | Concordant | 90 | 3.9  | Concordant | 0  | -3.4 | Discordant | 30 | -2.2 | Concordant | Surgical specimen |
| 97  | 0 | Negative | -3.6 | Concordant | 50 | 1    | Concordant | 50 | -1.7 | Concordant | 16 | -2.7 | Discordant | Surgical specimen |
| 100 | 0 | Negative | -1.4 | Concordant | 60 | 2.1  | Concordant | 90 | 2.5  | Concordant | 15 | -1.4 | Discordant | Surgical specimen |
| 101 | 0 | Negative | -2.4 | Concordant | 90 | 4.6  | Concordant | 50 | 1.3  | Concordant | 15 | -3.7 | Discordant | Surgical specimen |
| 102 | 0 | Negative | -2.4 | Concordant | 50 | 1.6  | Concordant | 90 | 1.3  | Concordant | 15 | -2.8 | Discordant | Surgical specimen |
| 104 | 0 | Negative | -4   | Concordant | 90 | 1.5  | Concordant | 10 | 1.3  | Concordant | 20 | -3   | Discordant | Surgical specimen |
| 106 | 0 | Negative | -4.1 | Concordant | 50 | 1.7  | Concordant | 75 | 0.7  | Concordant | 20 | -3   | Discordant | Surgical specimen |
| 107 | 0 | Negative | -3.7 | Concordant | 90 | 2.5  | Concordant | 40 | -3.3 | Concordant | 10 | -2.3 | Discordant | Surgical specimen |
| 112 | 0 | Negative | -2.4 | Concordant | 80 | 3.2  | Concordant | 0  | -2   | Discordant | 15 | -3.4 | Discordant | Surgical specimen |
| 113 | 0 | Negative | -3.8 | Concordant | 80 | 2.2  | Concordant | 80 | 1.7  | Concordant | 5  | -3.2 | Discordant | Surgical specimen |
| 114 | 0 | Negative | -2.5 | Concordant | 60 | 1.1  | Concordant | 80 | -0.8 | Concordant | 10 | -4   | Discordant | Surgical specimen |
| 120 | 0 | Negative | -5.1 | Concordant | 90 | -1.8 | Discordant | 20 | -4   | Discordant | 15 | -5.9 | Concordant | Surgical specimen |
| 124 | 1 | Negative | -2.2 | Concordant | 60 | 2.1  | Concordant | 80 | -1.9 | Concordant | 20 | -2.6 | Discordant | Surgical specimen |

|     |   |          |      |            |    |      |            |    |      |            |    |      |            |                        |
|-----|---|----------|------|------------|----|------|------------|----|------|------------|----|------|------------|------------------------|
| 125 | 0 | Negative | -2.4 | Concordant | 70 | 2.3  | Concordant | 0  | -1   | Discordant | 15 | -5.4 | Concordant | Surgical specimen      |
| 126 | 0 | Negative | -7.1 | Concordant | 90 | 2.7  | Concordant | 70 | 2.7  | Concordant | 16 | -2.7 | Discordant | Surgical specimen      |
| 129 | 0 | Negative | -5.4 | Concordant | 80 | -0.8 | Concordant | 60 | -1   | Concordant | 50 | -4.7 | Discordant | Surgical specimen      |
| 132 | 0 | Negative | -2.5 | Concordant | 60 | 3.2  | Concordant | 0  | -0.4 | Discordant | 10 | -4.2 | Concordant | Surgical specimen      |
| 133 | 0 | Negative | -2.2 | Concordant | 80 | 4.9  | Concordant | 25 | 1.1  | Concordant | 15 | -0.6 | Discordant | Surgical specimen      |
| 136 | 0 | Negative | -2.2 | Concordant | 70 | 2.9  | Concordant | 30 | 0.7  | Concordant | 10 | -1.6 | Discordant | Surgical specimen      |
| 138 | 0 | Negative | -2.6 | Concordant | 90 | 1.6  | Concordant | 70 | 1.7  | Concordant | 15 | -3.5 | Discordant | Surgical specimen      |
| 144 | 0 | Negative | -1.4 | Concordant | 0  | -7.1 | Concordant | 0  | -5.9 | Concordant | NA | -0.7 | Discordant | Core biopsy            |
| 148 | 1 | Negative | -3.8 | Concordant | 70 | 2.9  | Concordant | 0  | -1.8 | Discordant | 2  | -3.9 | Discordant | Core biopsy            |
| 150 | 0 | Negative | -3.5 | Concordant | 90 | 3.6  | Concordant | 90 | 2.3  | Concordant | 2  | -4   | Discordant | Core biopsy            |
| 153 | 1 | Negative | -4.1 | Concordant | 90 | 2    | Concordant | 0  | -3.5 | Discordant | 20 | -0.8 | Discordant | Core biopsy            |
| 155 | 0 | Negative | -3.4 | Concordant | 12 | -0.2 | Concordant | 60 | -0.5 | Concordant | 7  | -2.5 | Discordant | Core biopsy            |
| 156 | 1 | Negative | -2.6 | Concordant | 80 | 2.9  | Concordant | 80 | 2.1  | Concordant | 20 | -1.9 | Discordant | Core biopsy            |
| 163 | 0 | Negative | -3.7 | Concordant | 40 | 1.8  | Concordant | 0  | -1.5 | Discordant | 10 | -4.2 | Concordant | Core biopsy            |
| 165 | 1 | Negative | -3.1 | Concordant | 10 | 1.4  | Concordant | 70 | 2.6  | Concordant | 12 | -3   | Discordant | Core biopsy            |
| 172 | 0 | Negative | -5.1 | Concordant | 95 | 3.5  | Concordant | 40 | 2    | Concordant | 12 | -2.1 | Discordant | Core biopsy            |
| 173 | 1 | Negative | -3.6 | Concordant | 70 | 1.4  | Concordant | 0  | -2.1 | Discordant | 5  | -10  | Concordant | Vacuum assisted biopsy |
| 176 | 1 | Negative | -3.9 | Concordant | 90 | 4.1  | Concordant | 90 | 0.6  | Concordant | 5  | -3.2 | Discordant | Core biopsy            |
| 180 | 1 | Negative | -3   | Concordant | 90 | 3.2  | Concordant | 0  | -2.1 | Discordant | 3  | -3.9 | Discordant | Core biopsy            |
| 181 | 1 | Negative | -2.1 | Concordant | 95 | 3.6  | Concordant | 70 | 0.4  | Concordant | 15 | -3.1 | Discordant | Core biopsy            |
| 182 | 1 | Negative | -1.8 | Concordant | 90 | 4    | Concordant | 0  | -2.8 | Discordant | 5  | -6.4 | Concordant | Core biopsy            |
| 183 | 0 | Negative | -5.3 | Concordant | 80 | 3.2  | Concordant | 0  | 1.4  | Discordant | 20 | -1.9 | Discordant | Core biopsy            |
| 184 | 1 | Negative | -3.6 | Concordant | 60 | 2.6  | Concordant | 0  | -3.5 | Discordant | 5  | -3.7 | Discordant | Core biopsy            |
| 187 | 1 | Negative | -4.2 | Concordant | 90 | 3.8  | Concordant | 1  | -3.9 | Discordant | 2  | -4.3 | Concordant | Core biopsy            |

|     |   |          |      |            |     |      |            |     |      |            |    |      |            |                   |
|-----|---|----------|------|------------|-----|------|------------|-----|------|------------|----|------|------------|-------------------|
| 188 | 0 | Negative | -3.1 | Concordant | 70  | 2.1  | Concordant | 20  | 0    | Concordant | 20 | -2   | Discordant | Core biopsy       |
| 191 | 0 | Negative | -3.5 | Concordant | 40  | 2.4  | Concordant | 0   | -0.4 | Discordant | 5  | -4.2 | Concordant | Core biopsy       |
| 194 | 1 | Negative | -3.5 | Concordant | 70  | 2.2  | Concordant | 70  | 1.4  | Concordant | 10 | -3.2 | Discordant | Core biopsy       |
| 195 | 0 | Negative | -1.4 | Concordant | 90  | 5.3  | Concordant | 2   | -2   | Concordant | 10 | -2.5 | Discordant | Core biopsy       |
| 208 | 1 | Negative | -2.1 | Concordant | 100 | 4.4  | Concordant | 50  | 0.9  | Concordant | 18 | -1.5 | Discordant | Core biopsy       |
| 209 | 1 | Negative | -2   | Concordant | 65  | 5    | Concordant | 0   | 2.1  | Discordant | 3  | -3.6 | Discordant | Core biopsy       |
| 222 | 1 | Negative | -2.5 | Concordant | 80  | 3    | Concordant | 20  | 0.3  | Concordant | 10 | -2.4 | Discordant | Core biopsy       |
| 225 | 1 | Negative | -2.4 | Concordant | 80  | 1.6  | Concordant | 40  | 0.1  | Concordant | 5  | -3.9 | Discordant | Core biopsy       |
| 238 | 1 | Negative | -4.6 | Concordant | 80  | 4.7  | Concordant | 0   | -8.6 | Concordant | 5  | -3   | Discordant | Core biopsy       |
| 244 | 0 | Negative | -2.7 | Concordant | 100 | 4.5  | Concordant | 100 | 2    | Concordant | 5  | -3.1 | Discordant | Core biopsy       |
| 245 | 0 | Negative | -3.9 | Concordant | 0   | -10  | Concordant | 8   | -5.7 | Discordant | 80 | 0.5  | Concordant | Core biopsy       |
| 247 | 1 | Negative | -3   | Concordant | 90  | 2.7  | Concordant | 60  | 0.3  | Concordant | 20 | -2.9 | Discordant | Core biopsy       |
| 253 | 3 | Positive | 1.4  | Concordant | 0   | -8.1 | Concordant | 0   | -5.2 | Concordant | 17 | -1.4 | Discordant | core biopsy       |
| 258 | 3 | Positive | 1.6  | Concordant | 70  | 0.1  | Concordant | 100 | 1.5  | Concordant | 8  | -3.2 | Discordant | Core biopsy       |
| 259 | 3 | Positive | 0.9  | Concordant | 0   | -2.9 | Concordant | 0   | -4.3 | Concordant | 12 | -3   | Discordant | Core biopsy       |
| 260 | 3 | Positive | 2.1  | Concordant | 5   | -1.5 | Discordant | 5   | -2.3 | Concordant | 12 | -2.8 | Discordant | Core biopsy       |
| 261 | 3 | Positive | 0.6  | Concordant | 90  | 1.2  | Concordant | 50  | -1   | Concordant | 18 | -2.3 | Discordant | Core biopsy       |
| 262 | 3 | Positive | 3.2  | Concordant | 0   | -2.9 | Concordant | 0   | -3.1 | Discordant | 50 | -1.8 | Concordant | Core biopsy       |
| 263 | 3 | Positive | 0.8  | Concordant | 0   | -3.5 | Concordant | 0   | -3.1 | Discordant | 20 | -2   | Discordant | Core biopsy       |
| 265 | 3 | Positive | 0.4  | Concordant | 70  | 1.1  | Concordant | 60  | 0    | Concordant | 18 | -2.7 | Discordant | Core biopsy       |
| 267 | 3 | Positive | 1.6  | Concordant | 60  | 0.5  | Concordant | 0   | -5.3 | Concordant | 17 | -3.4 | Discordant | Core biopsy       |
| 268 | 3 | Positive | 1.2  | Concordant | 0   | -1.1 | Concordant | 0   | -10  | Concordant | 9  | -1.8 | Discordant | Surgical specimen |
| 269 | 3 | Positive | 2.5  | Concordant | 90  | 2.9  | Concordant | 20  | -0.7 | Concordant | 18 | -2.9 | Discordant | Core biopsy       |
| 273 | 3 | Positive | 2.6  | Concordant | 10  | -1.6 | Discordant | 0   | -10  | Concordant | 50 | -1.2 | Concordant | Core biopsy       |
| 274 | 3 | Positive | 1.4  | Concordant | 0   | -2.9 | Concordant | 0   | -4.9 | Concordant | 18 | -1.4 | Discordant | Core biopsy       |
| 275 | 3 | Positive | 1.8  | Concordant | 0   | -6.4 | Concordant | 0   | -10  | Concordant | 19 | -1.6 | Discordant | Core biopsy       |
| 279 | 3 | Positive | -1.1 | Discordant | 90  | 1.8  | Concordant | 100 | 1.5  | Concordant | 40 | -0.8 | Concordant | Core biopsy       |
| 280 | 3 | Positive | 1    | Concordant | 80  | 2.9  | Concordant | 5   | -8.2 | Discordant | 28 | -1.5 | Concordant | Core biopsy       |
